# Supplementary material for: <em>In Vitro</em> Screening of Endophytic<em> Micromonospora</em> Strains Associated with White Clover for Biological Control of Phytopathogenic Fungi and Promotion of Plant Growth
Source: Preprints.org preprint supplement (doi:10.20944/preprints202403.1617.v1), 2024-03-27
Supplement: Supplementary file 1 [file supplementary]

| **Table S1.** *Micromonospora* strains used in this study | |
| --- | --- |
| **Bacterial strain** | **Origin (country)** |
| *Micromonospora alfalfae* 50 | South Africa |
| *Micromonospora alfalfae* 53 | South Africa |
| *Micromonospora alfalfae* 55 | South Africa |
| *Micromonospora inaquosa* 30 | South Africa |
| *Micromonospora inaquosa* 33 | South Africa |
| *Micromonospora inaquosa* 152 | South Africa |
| *Micromonospora inaquosa* 230 | South Africa |
| *Micromonospora inaquosa* N2 | South Africa |
| *Micromonospora purpureochromogenes* N5 | South Africa |
| *Micromonospora tulbaghiae* 48 | South Africa |
| *Micromonospora tulbaghiae* N4 | South Africa |
| *Micromonospora violae* 29 | South Africa |
| *Micromonospora violae* 43 | South Africa |
| *Micromonospora violae* 45 | South Africa |
| *Micromonospora violae* 66 | South Africa |
| *Micromonospora violae* 126 | South Africa |
| *Micromonospora violae* 249 | South Africa |
|  |  |
| *Micromonospora lupini* 5052 | Poland |
| *Micromonospora purpureochromogenes* 5056 | Poland |
